# Supplementary material for: “Closing the loop”: a mixed-methods study about resident learning from outcome feedback after patient handoffs
Source: publisher site journal article supplement (doi:10.1515/dx-2018-0013), 2018-09-21
Supplement: Supplementary file 1 [file dx-2018-0013_suppl.zip]

**Appendix:**

Table A1. Full Table of Survey Responses

| **Survey Question** | **Responses**  **n (%)** | | | | |
| --- | --- | --- | --- | --- | --- |
|  | Almost  Never | Rarely | Sometimes | Often | Almost Always |
| 1. How often does someone else send you information regarding the outcomes of hospitalized patients you handed off to other providers? | 32 (41.0) | 36 (46.2) | 8 (10.3) | 1 (1.3) | 1 (1.3) |
| 2. How often do you actively search for the outcomes of hospitalized patients you handed off to other providers? | 0 | 2 (2.6) | 36 (46.2) | 34 (43.6) | 6 (7.7) |
| 3. Overall, how often do you find out the outcomes of hospitalized patients after you hand them off to other teams? | 1 (1.3) | 15 (19.2) | 42 (53.8) | 18 (23.1) | 2 (2.6) |
|  | Not at all Important | Low Impor-tance | Neutral | Moderate Impor-tance | Very  Important |
| 4. How important to your education is learning the outcomes of patients you handed off? | 0 | 1 (1.3) | 3 (3.8) | 29 (37.2) | 45 (57.7) |
| 5. How important to your job satisfaction is learning the outcomes of patients you handed off? | 0 | 0 | 4 (5.1) | 43 (55.1) | 31 (39.7) |
|  | Very Dissatis-fied | Dissatis-fied | Neutral | Satisfied | Very Satisfied |
| 6. How satisfied are you with current systems available to learn about the outcomes of patients you handed off? | 5 (6.4) | 30 (38.5) | 31 (39.7) | 7 (9.0) | 5 (6.4) |
|  | | | | | |
| Which method(s) do you use to learn about the outcomes of hospitalized patients you have handed off: | | | | | |
|  | Almost  Never | Rarely | Sometimes | Often | Almost Always |
| 7. Keeping a list of patients of interest and looking up patients’ medical records | 0 | 6 (7.7) | 21 (26.9) | 34 (43.6) | 17 (21.8) |
| 8. Occasionally looking through all recent patients and looking up patients’ medical records* | 8 (10.7) | 11 (14.7) | 22 (29.3) | 26 (34.7) | 8 (10.7) |
| 9. Directly contacting patients (e.g. phone calls) | 47 (60.3) | 13 (16.7) | 12 (15.4) | 5 (6.4) | 1 (1.3) |
| 10. Informal conversations with other providers (attendings, residents, PAs, NPs, RNs, etc) | 3 (3.8) | 14 (17.9) | 43 (55.1) | 16 (20.5) | 2 (2.6) |
| 11. Attending a meeting or conference (e.g. M&M conference) | 18 (23.1) | 25 (32.1) | 23 (29.5) | 10 (12.8) | 2 (2.6) |
|  | | | | | |
| Which of the following are the main barriers to learning the outcomes of patients you have handed off? | | | | | |
|  | Strongly disagree | Disagree | Neutral | Agree | Strongly agree |
| 12. Too little time given clinical responsibilities | 2 (2.6) | 9 (11.5) | 17 (21.8) | 32 (41.0) | 18 (23.1) |
| 13. No reliable system to keep track of post-handoff patient numbers | 4 (5.1) | 10 (12.8) | 8 (10.3) | 35 (44.9) | 21 (26.9) |
| 14. Expectation that if something major happens, someone will let me know | 10 (12.8) | 45 (57.7) | 10 (12.8) | 13 (16.7) | 0 |
| 15. No access to record system (e.g., new rotation at a different hospital) | 21 (26.9) | 28 (35.9) | 7 (9.0) | 20 (25.6) | 2 (2.6) |
| 16. Little perceived value in doing so | 37 (47.4) | 29 (37.2) | 10 (12.8) | 2 (2.6) | 0 |

*Three respondents skipped this question, so the totals do not sum to 78 as the other responses do.

Table A2. Survey Regression Results

| **Survey Item** | **Regression Results** | | | |
| --- | --- | --- | --- | --- |
|  | Predictor | Coefficient | Standard Error | Adjusted p-value |
| 1. How often does someone else send you information regarding the outcomes of hospitalized patients you handed off to other providers? | IM Service | 18.113 | 6299.907 | 1.00 |
| Year of Training | -0.126 | 0.703 | 0.86 |
| Male Gender | 18.617 | 4563.608 | 1.00 |
| 2. How often do you actively search for the outcomes of hospitalized patients you handed off to other providers? | IM Service | -0.136 | 0.557 | 0.81 |
| Year of Training | 0.125 | 0.227 | 0.58 |
| Male Gender | 0.513 | 0.459 | 0.26 |
| 3. Overall, how often do you find out the outcomes of hospitalized patients after you hand them off to other teams? | IM Service | 1.238 | 0.812 | 0.13 |
| Year of Training | -0.022 | 0.260 | 0.93 |
| Male Gender | 0.249 | 0.530 | 0.64 |
| 4. How important to your education is learning the outcomes of patients you handed off? | IM Service | -16.860 | 2532.000 | 1.00 |
| Year of Training | 0.124 | 0.522 | 0.81 |
| Male Gender | -0.002 | 1.036 | 1.00 |
| 5. How important to your job satisfaction is learning the outcomes of patients you handed off? | IM Service | 1.297 | 1.076 | 0.23 |
| Year of Training | 0.099 | 0.523 | 0.85 |
| Male Gender | -1.048 | 1.189 | 0.38 |
| 6. How satisfied are you with current systems available to learn about the outcomes of patients you handed off? | IM Service | 0.497 | 0.841 | 0.56 |
| Year of Training | 0.058 | 0.308 | 0.85 |
| Male Gender | -0.043 | 0.630 | 0.95 |
| *Which method(s) do you use to learn about the outcomes of hospitalized patients you have handed off:* | | | | |
| 7. Keeping a list of patients of interest and looking up patients’ medical records | IM Service | 0.825 | 0.562 | 0.14 |
| Year of Training | -0.025 | 0.238 | 0.92 |
| Male Gender | -0.236 | 0.486 | 0.63 |
| 8. Occasionally looking through all recent patients and looking up patients’ medical records | IM Service | 0.586 | 0.605 | 0.33 |
| Year of Training | 0.546 | 0.256 | 0.03 |
| Male Gender | 0.307 | 0.483 | 0.52 |
| 9. Directly contacting patients (e.g. phone calls) | IM Service | -3.460 | 1.208 | 0.004 |
| Year of Training | -0.499 | 0.492 | 0.31 |
| Male Gender | -0.337 | 0.962 | 0.73 |
| 10. Informal conversations with other providers (attendings, residents, PAs, NPs, RNs, etc.) | IM Service | 0.364 | 0.717 | 0.61 |
| Year of Training | -0.266 | 0.278 | 0.34 |
| Male Gender | -0.353 | 0.546 | 0.52 |
| 11. Attending a meeting or conference (e.g., M&M conference) | IM Service | -1.716 | 0.709 | 0.02 |
| Year of Training | -0.272 | 0.338 | 0.42 |
| Male Gender | -0.610 | 0.673 | 0.36 |
| *Which of the following are the main barriers to learning the outcomes of patients you have handed off?* | | | | |
| 12. Too little time given clinical responsibilities | IM Service | -0.301 | 0.587 | 0.61 |
| Year of Training | -0.263 | 0.236 | 0.27 |
| Male Gender | -0.388 | 0.480 | 0.42 |
| 13. No reliable system to keep track of post-handoff patient numbers | IM Service | -0.949 | 0.707 | 0.18 |
| Year of Training | -0.184 | 0.250 | 0.46 |
| Male Gender | -0.219 | 0.512 | 0.67 |
| 14. Expectation that if something major happens, someone will let me know | IM Service | -0.718 | 0.711 | 0.31 |
| Year of Training | -0.348 | 0.322 | 0.28 |
| Male Gender | -0.684 | 0.633 | 0.28 |
| 15. No access to record system (e.g., new rotation at a different hospital) | IM Service | -0.372 | 0.654 | 0.57 |
| Year of Training | -0.778 | 0.295 | 0.008 |
| Male Gender | -0.120 | 0.532 | 0.82 |
| 16. Little perceived value in doing so | IM Service | 16.793 | 4039.211 | 1.00 |
| Year of Training | -0.773 | 0.933 | 0.41 |
| Male Gender | -0.013 | 1.449 | 0.99 |

M&M= morbidity and mortality conference, NP = nurse practitioner, PA = physician assistant, RN = registered nurse
